# Supplementary material
Source: publisher figshare collection journal article supplement (https://tandf.figshare.com/ndownloader/files/30772807)
Supplement: Supplementary file 1 [file 30772807]

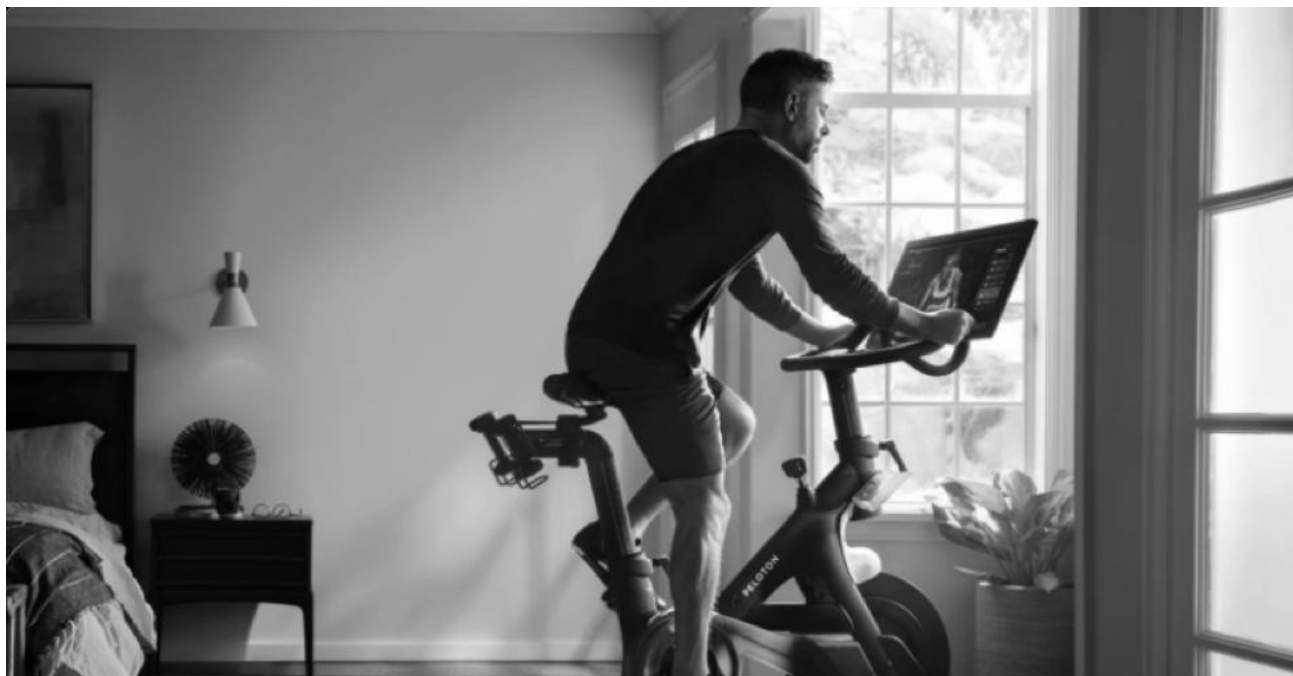

**Supplementary Figure 1.** (Screenshot by author, [www.onepeloton.com/bike](http://www.onepeloton.com/bike), accessed 10 December 2020).

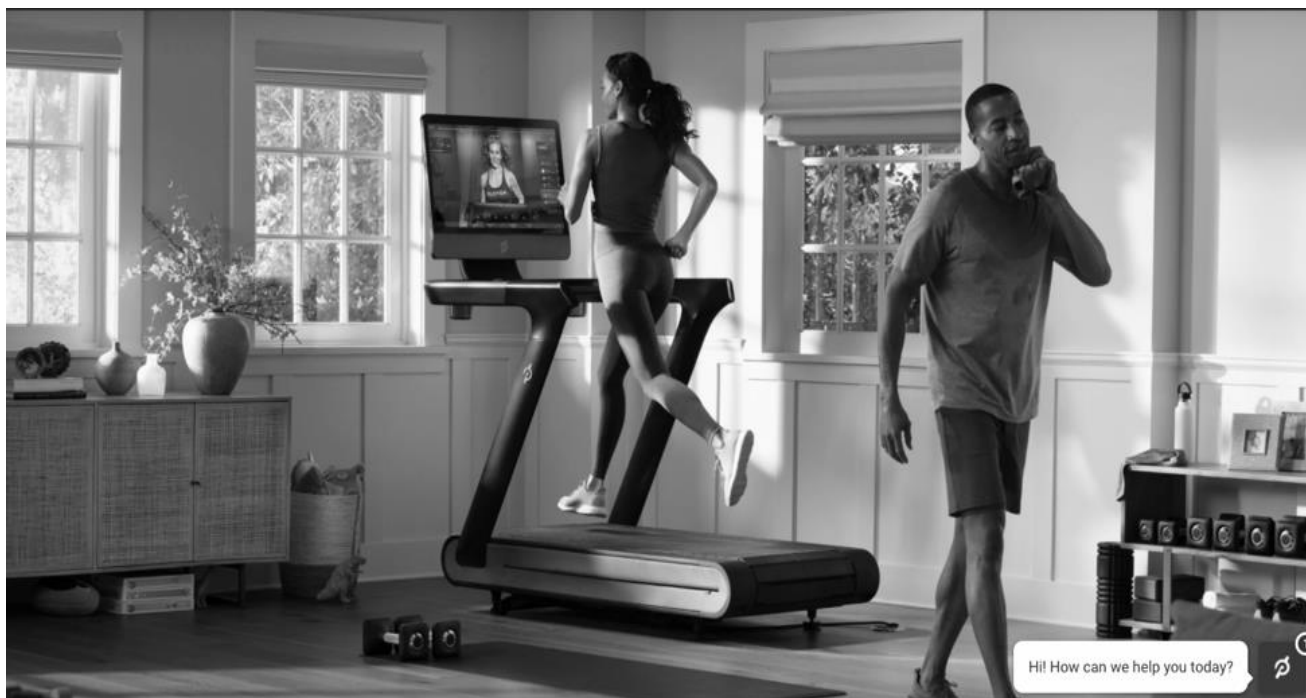

**Supplementary Figure 2.** (Screenshot by author, [www.onepeloton.com/tread-plus](http://www.onepeloton.com/tread-plus), accessed 10 December 2020).

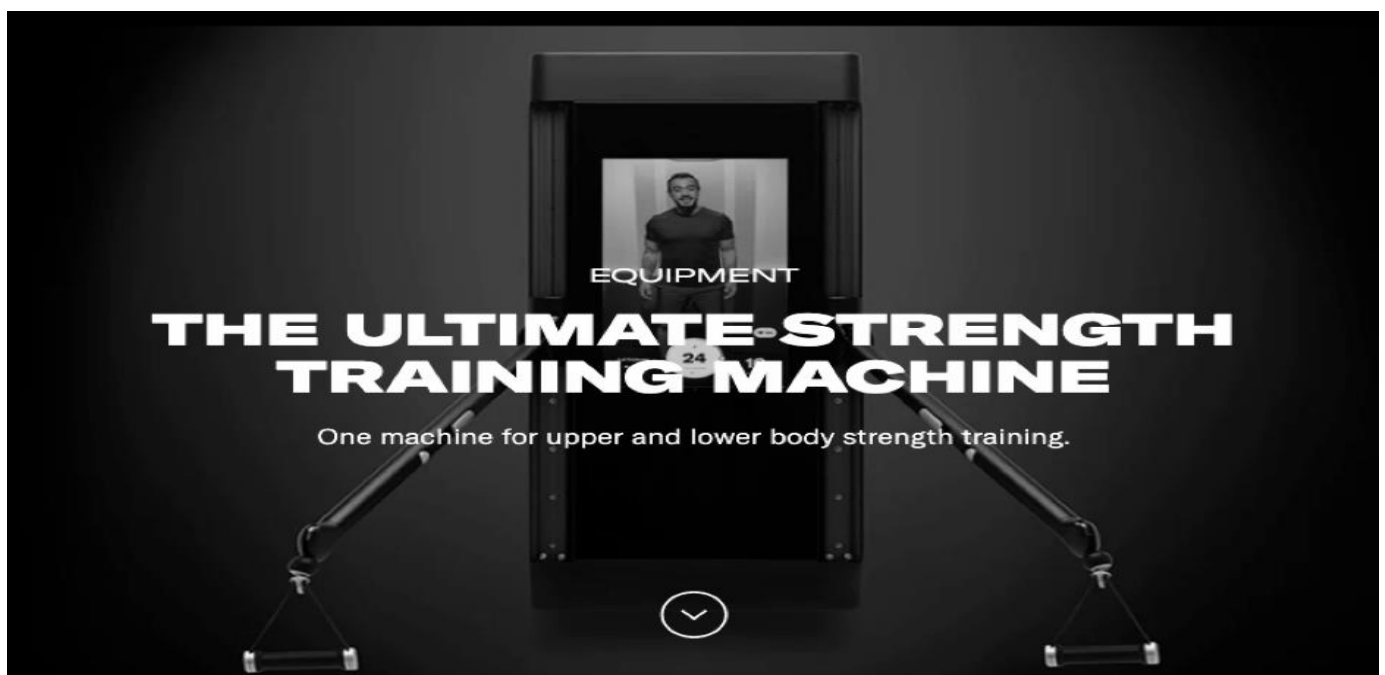

**Supplementary Figure 3.** (Screenshots by author, [www.tonal.com/equipment](http://www.tonal.com/equipment), accessed 10 December 2020).

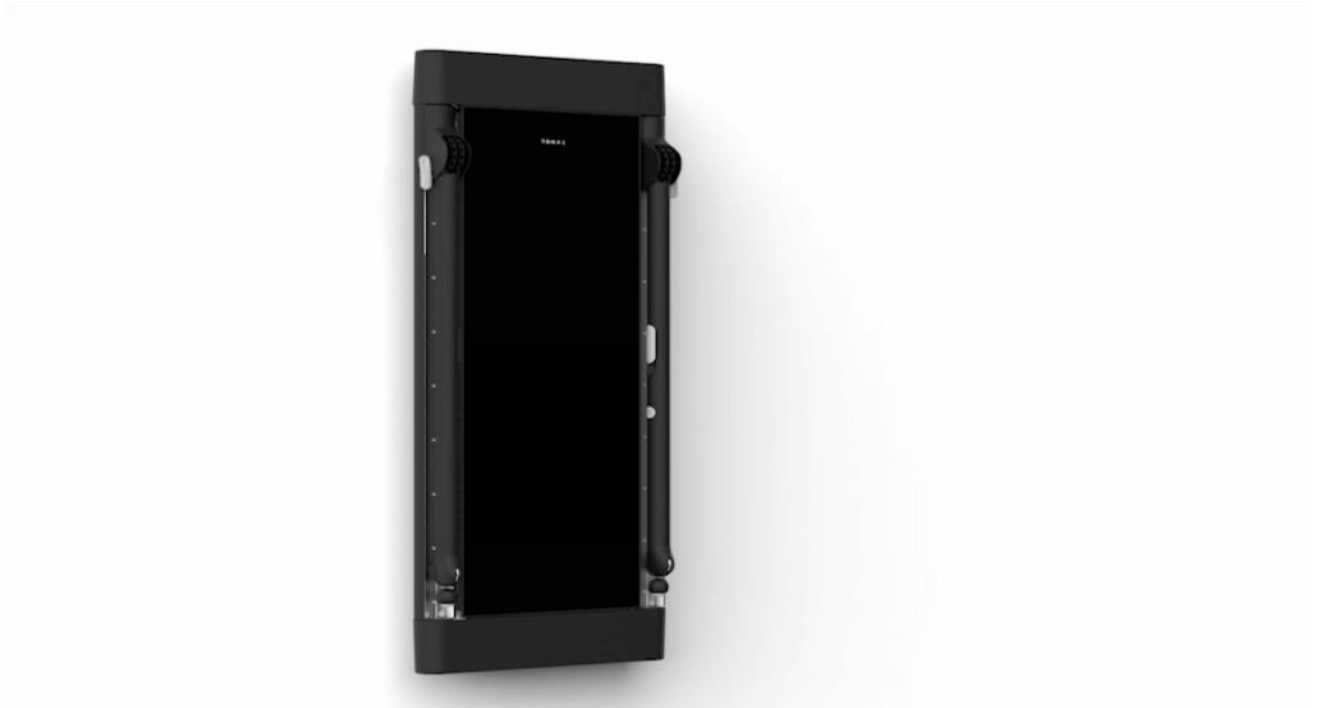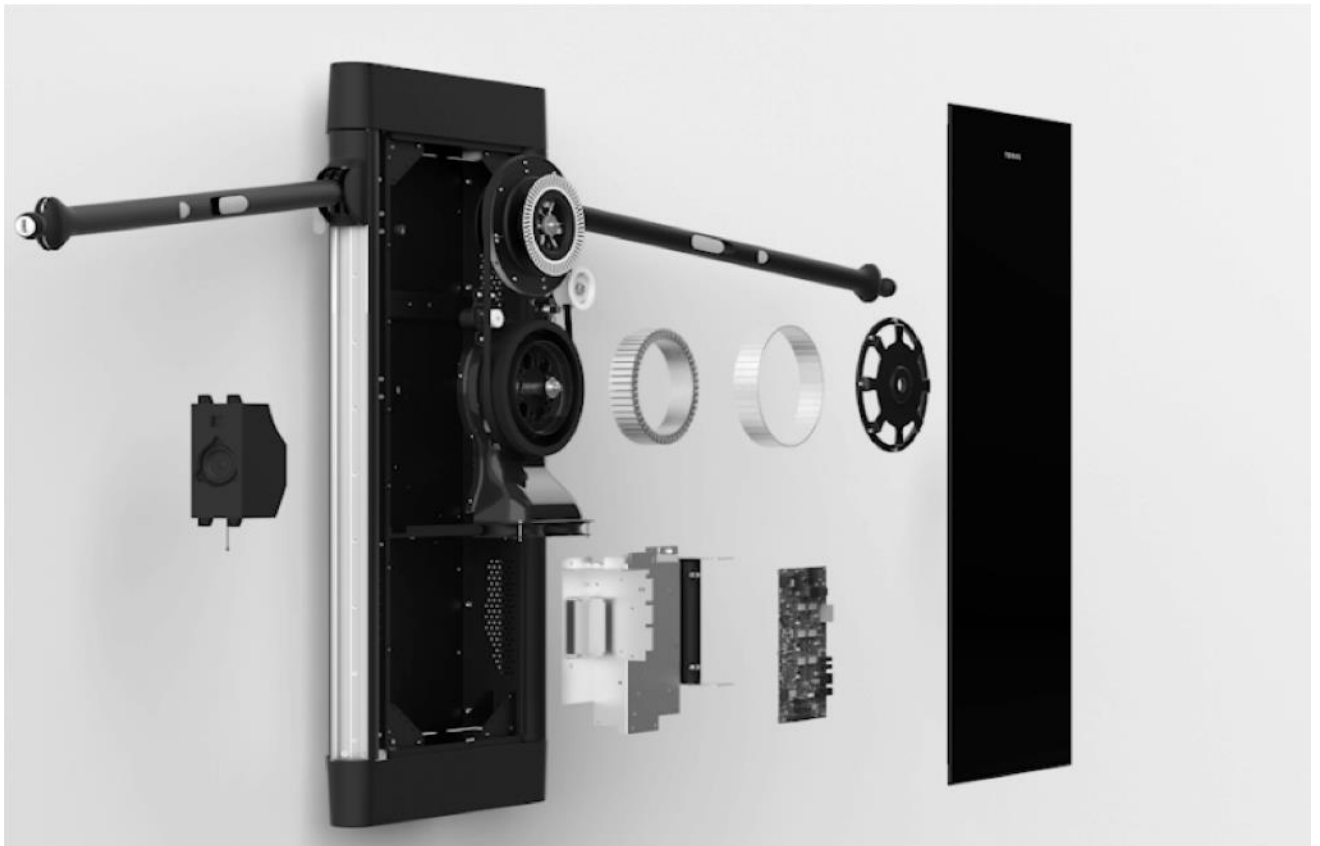

**Supplementary Figure 4.** (Screenshots by author, [www.tonal.com/equipment](http://www.tonal.com/equipment) accessed 10 December 2020).
